# Supplementary material
Source: MDPI journal article supplement (https://www.mdpi.com/2077-0472/11/7/683)
Supplement: s1 [file s1]

**Table S1.** Characteristics of evaluated product base materials (Broiler and hen manure).

| Parameters                      | Broiler manure | Hen manure |
|---------------------------------|----------------|------------|
| Dry matter content (w/w%)       | 65-70          | 63-67      |
| pH                              | 6.91-7.40      | 6.59-6.82  |
| Electrical conductivity (mS/cm) | 11.10          | 12.78      |
| Total nitrogen (w/w%)           | 2.75           | 2.14       |
| Oragnic matter content (w/w%)   | 58.81          | 66.18      |

**Table S2.** Changes of plant shoot length (cm) and total chlorophyll content (µg/g) in Arenosol soil, week 4 and week 8 of the treatments (p<0.05)\*.

|         | Plant shoot length (cm) | Total chlorophyll content (µg/g) |
|---------|-------------------------|----------------------------------|
| Control | 38.00ab ± 0.04          | 3045.55ab ± 220.32               |
| D1W4    | 39.50ab ± 0.00          | 3549.54ab ± 446.59               |
| D2W4    | 41.00a ± 2.65           | 4136.49c ± 344.17                |
| D1W8    | 40.33a ± 2.89           | 3028.96ab ± 356.25               |
| D2W8    | 37.66a ± 2.08           | 3770.56ab ± 742.31               |

\*no significant difference between treatments marked with the same letter.

**Table S3.** Changes of plant shoot length (cm) and total chlorophyll content (µg/g) in slightly humous Arenosol soil, week 4 and week 8 of the treatments (p<0.05)\*.

|         | Plant shoot length (cm) | Total chlorophyll content (µg/g) |
|---------|-------------------------|----------------------------------|
| Control | 36.58c ± 0.58           | 3379.17b ± 310.64                |
| D1W4    | 37.83bc ± 1.26          | 3593.27b ± 225.44                |
| D2W4    | 37.00bc ± 0.50          | 3431.26b ± 542.56                |
| D1W8    | 39.50a ± 2.78           | 3408.46ab ± 389.87               |
| D2W8    | 40.66a ± 1.61           | 4249.62a ± 458.76                |

\*no significant difference between treatments marked with the same letter.

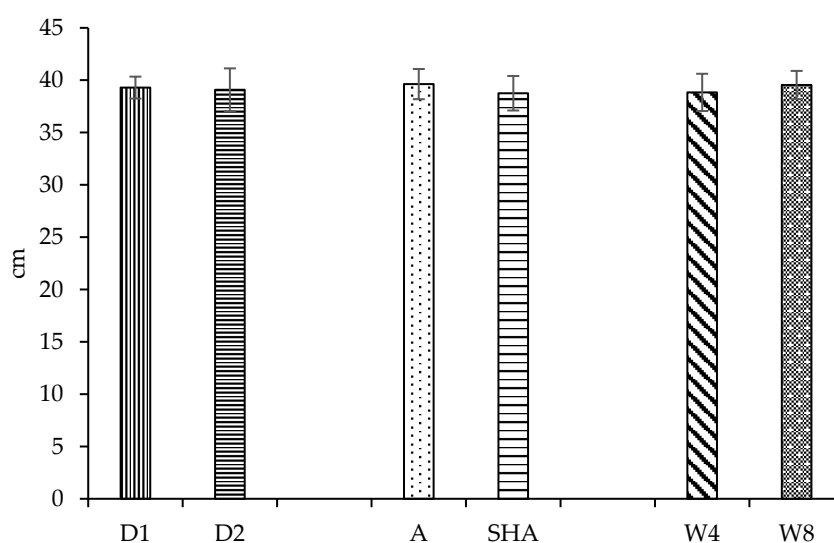**Figure S1.** Summary of total shoot length (cm) results by treatments (Doses), soil types, sampling weeks. The codes are as follows: D1: Dose 1. D2: Dose 2. A: Arenosol. SHA: slightly humous Arenosol. W4: Week 4. W8: Week 8.

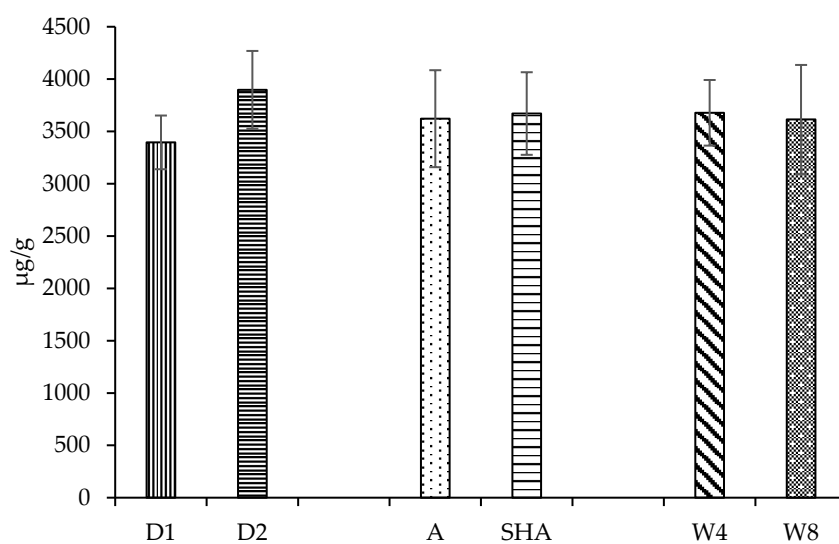

**Figure S2.** Summary of total chlorophyll content ( $\mu\text{g/g}$ ) results by treatments (Doses), soil types, sampling weeks. The codes are as follows: D1: Dose 1. D2: Dose 2. A: Arenosol. SHA: Slightly humous Arenosol. W4: Week 4. W8: Week 8.
